# Supplementary material for: Heteropoly acid-grafted iron oxide catalysts for efficient selective catalytic reduction of NOx with NH3
Source: Royal Society of Chemistry journal article supplement (doi:10.1039/d4cy00210e), 2024-01-01
Supplement: d4cy00210e1.pdf [file d4cy00210e1.pdf]

*Electronic Supplementary Information*

**Heteropoly acid-grafted iron oxide catalysts for efficient selective  
catalytic reduction of NO<sub>x</sub> with NH<sub>3</sub>**

Yang Geng <sup>a\*</sup>, Zhihua Lian <sup>b</sup>, Yan Zhang <sup>b,c</sup>, Janqi Liu <sup>b,c</sup>, Dongliang Jin <sup>d</sup>, Wenpo Shan <sup>b,c\*</sup>

<sup>a</sup> School of Environment Engineering, Wuxi University, Wuxi 214105, P. R. China

<sup>b</sup> Center for Excellence in Regional Atmospheric Environment and Key Laboratory of Urban Pollutant Conversion, Institute of Urban Environment, Chinese Academy of Science, Xiamen 361021, P. R. China

<sup>c</sup> Zhejiang Key Laboratory of Urban Environmental Processes and Pollution Control, Ningbo Urban Environment Observation and Research Station, Institute of Urban Environment, Chinese Academy of Sciences, Ningbo 315800, P. R. China

<sup>d</sup> School of Environmental Science and Engineering, Nanjing University of Information Science & Technology, Nanjing 210044, P. R. China

\*Corresponding author: gengy@cw Xu.edu.cn (Yang Geng); wps Shan@iue.ac.cn (Wenpo Shan)

## S1 NO oxidation

Fig. S1 shows the NO conversion during the NO oxidation experiment over HSiW/Fe<sub>2</sub>O<sub>3</sub>, HPW/Fe<sub>2</sub>O<sub>3</sub>, and HPMo/Fe<sub>2</sub>O<sub>3</sub> catalysts at 150-500 °C. The NO conversion over all catalysts was below 9% at the whole temperature window. It was observed that the NO oxidation activity on HPMo/Fe<sub>2</sub>O<sub>3</sub> was less than those on HSiW/Fe<sub>2</sub>O<sub>3</sub> and HPW/Fe<sub>2</sub>O<sub>3</sub> catalysts at 250-500 °C. With the increase of temperature, both HSiW/Fe<sub>2</sub>O<sub>3</sub> and HPW/Fe<sub>2</sub>O<sub>3</sub> catalysts could reach the maximum values of NO conversion at 300 °C.

## S2 XPS results of W 4f and Mo 3d

The XPS results of W 4f and Mo 3d of HPA/Fe<sub>2</sub>O<sub>3</sub> catalysts are shown in Fig. S2. A doublet peak corresponding to W 4f photoelectrons appeared at 37.7-37.5 eV and 35.6-35.4 eV were obtained on the HSiW/Fe<sub>2</sub>O<sub>3</sub> and HPW/Fe<sub>2</sub>O<sub>3</sub>. This was associated with W in the formal (VI) oxidation state. The Mo 3d binding energies of HPMo/Fe<sub>2</sub>O<sub>3</sub> mainly centered at 236.0 and 232.8 eV, which were attributed to Mo<sup>6+</sup>.

## S3 DFT calculations

### S3.1 Computational Methods

All calculations are based on the CASTEP program package, using the generalized gradient approximation (GGA-PBE) with the Perdew-Burke-Ernzerh of exchange correlation function and super soft pseudopotential, and using a plane wave extension with a cut-off energy of 500 eV. The Brillouin area sampling adopts the Monkhorst-Park format, and the model adopts a  $1 \times 1 \times 1$  K-point grid. The convergence standards for structure optimization and energy calculation are SCF tolerance is  $1.0 \times 10^{-5}$  eV/atom, Energy tolerance is  $1.0 \times 10^{-5}$  eV/atom, Max force tolerance is 0.05 eV/Å, and Maximum displacement tolerance is 0.002 Å.

### S3.2 Formation of NH<sub>2</sub>NO

The formation of NH<sub>2</sub>NO is a key step in the SCR reaction.<sup>S1</sup> NH<sub>2</sub>NO undergoes a series of reactions and decomposes into N<sub>2</sub> and H<sub>2</sub>O.<sup>S2-3</sup> DFT calculations were utilized to further investigate the Langmuir-Hinshelwood mechanism and the Eley-Rideal mechanism of the SCR reaction over HPW/Fe<sub>2</sub>O<sub>3</sub>. As shown in Fig. S5A, the reaction energy of NH<sub>2</sub>NO formation on HPW/Fe<sub>2</sub>O<sub>3</sub> through the Langmuir-Hinshelwood mechanism was 0.85 eV. However, when NH<sub>2</sub>NO formed on

HPW/Fe<sub>2</sub>O<sub>3</sub> through the Eley-Rideal mechanism, the reaction energy was -0.33 eV (shown in Fig. S5B). The calculation results suggested that the NH<sub>2</sub>NO formation is more inclined to the SCR reaction pathway of the Eley-Rideal mechanism.

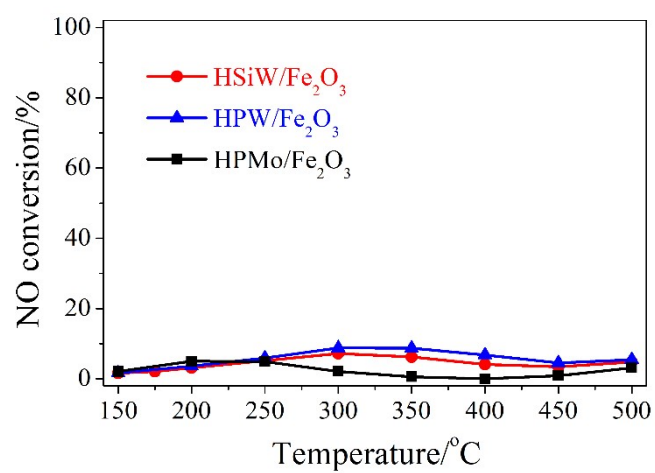

**Fig. S1.** NO oxidation over HSiW/Fe<sub>2</sub>O<sub>3</sub>, HPW/Fe<sub>2</sub>O<sub>3</sub>, and HPMo/Fe<sub>2</sub>O<sub>3</sub> catalysts. Reaction conditions: [NO] = 500 ppm, [O<sub>2</sub>] = 5%, catalyst mass = 100 mg, total flow rate = 100 mL min<sup>-1</sup>, and WHSV = 60,000 cm<sup>3</sup> g<sup>-1</sup> h<sup>-1</sup>.

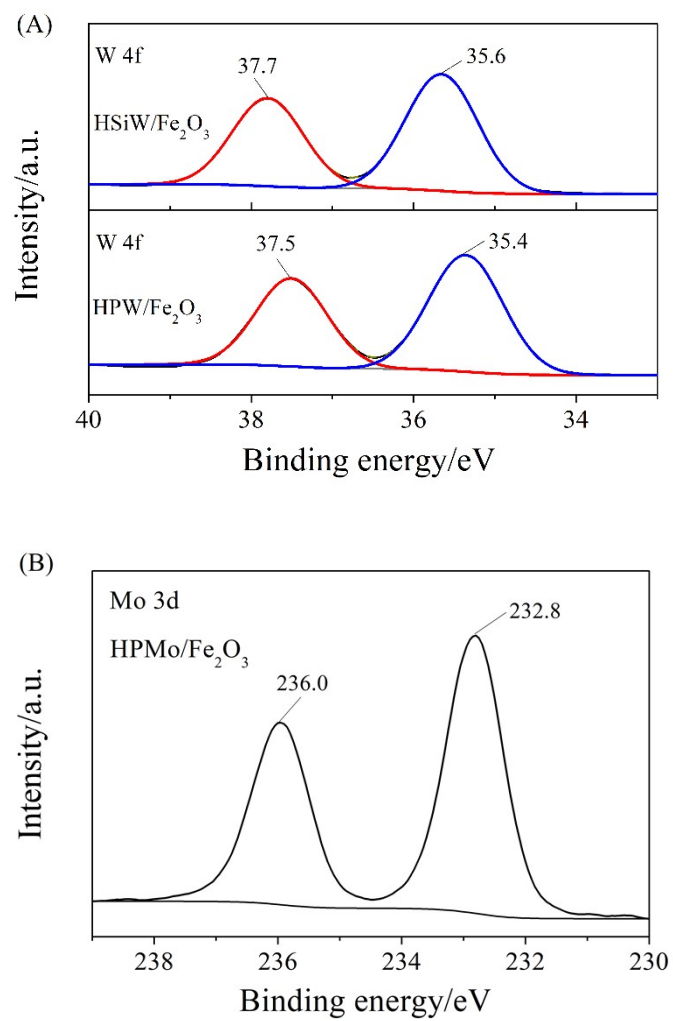

**Fig. S2.** XPS spectra of HSiW/Fe<sub>2</sub>O<sub>3</sub>, HPW/Fe<sub>2</sub>O<sub>3</sub>, and HPMo/Fe<sub>2</sub>O<sub>3</sub> catalysts over the spectral regions of W 4f and Mo 3d.

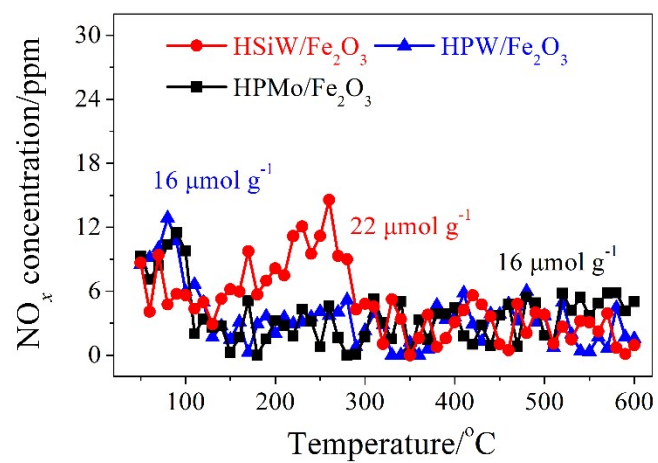

**Fig. S3.** NO<sub>x</sub>-TPD results for HSiW/Fe<sub>2</sub>O<sub>3</sub>, HPW/Fe<sub>2</sub>O<sub>3</sub>, and HPMo/Fe<sub>2</sub>O<sub>3</sub> catalysts.

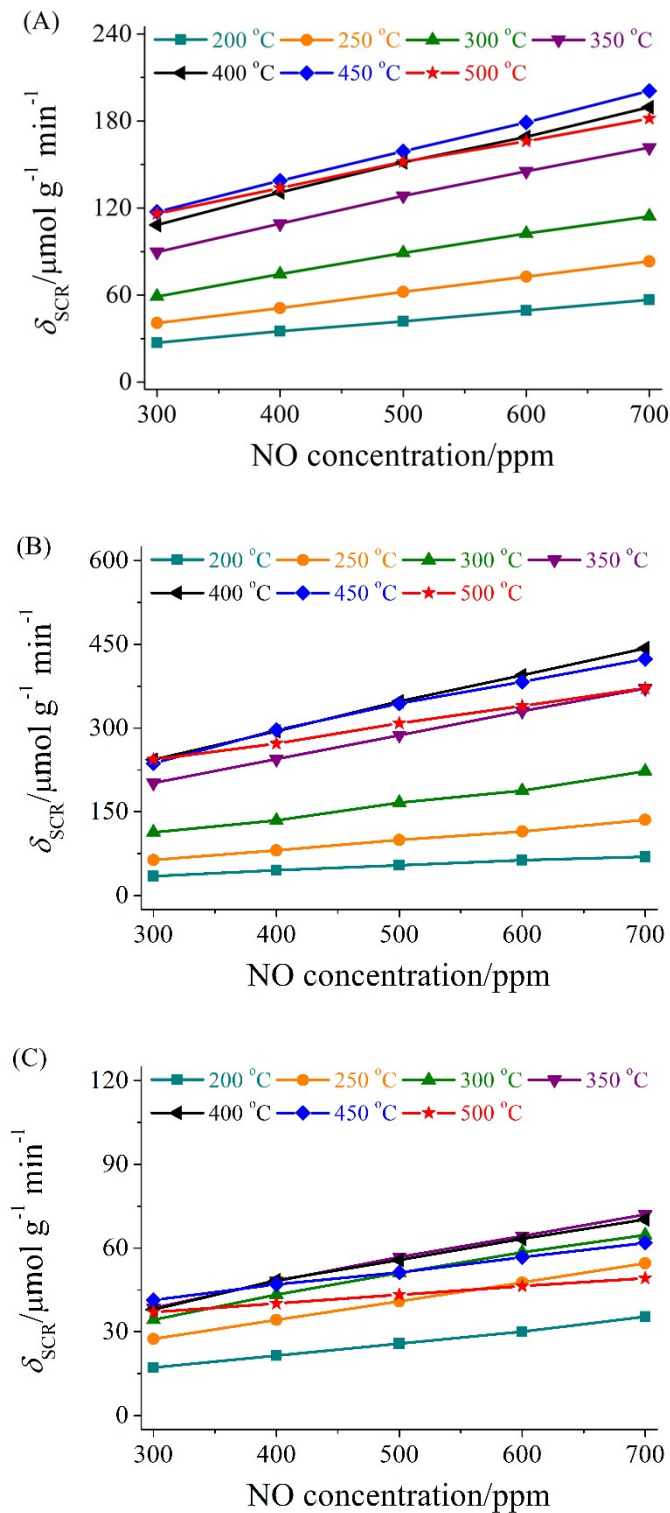

**Fig. S4.** Dependences of the SCR reaction rate during NO reduction over (A) HSiW/Fe<sub>2</sub>O<sub>3</sub>, (B) HPW/Fe<sub>2</sub>O<sub>3</sub>, and (C) HPMo/Fe<sub>2</sub>O<sub>3</sub> on gaseous NO concentration. Reaction conditions: [NH<sub>3</sub>]=500 ppm, [NO]=300-700 ppm, [O<sub>2</sub>]=5%, catalyst mass=3-30 mg, total flow rate=400 mL min<sup>-1</sup>, and WHSV=800,000-8,000,000 cm<sup>3</sup> g<sup>-1</sup> h<sup>-1</sup>.

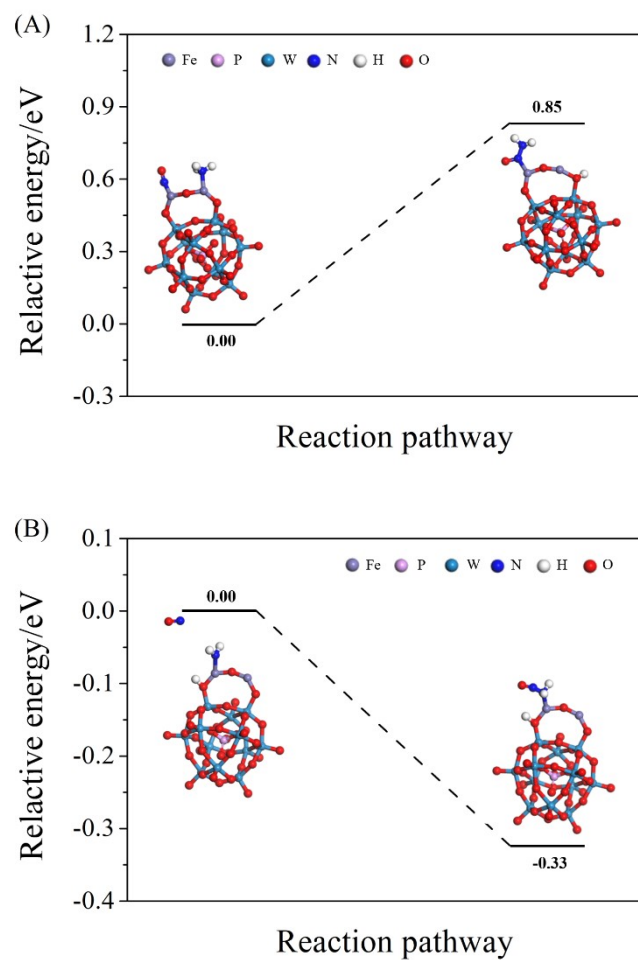

**Fig. S5.** Energy profiles and the corresponding optimized structures of the  $\text{NH}_2\text{NO}$  formation on  $\text{HPW}/\text{Fe}_2\text{O}_3$  through (A) the Langmuir-Hinshelwood mechanism and (B) the Eley-Rideal mechanism.



## References

- S1 J. Q. Liu, X. Ren, Z. D. Zhang, N. Sun, H. L. Tan and J. M. Cai, *J. Phys. Chem. C*, 2021, **125**, 14228-14238.
- S2 G. Z. Qin, Y. N. Zhang, J. F. Zheng, Y. F. Li, X. J. Han and Z. G. Huang, *Fuel*, 2023, **349**, 128621.
- S3 D. D. Ren, K. T. Gui, S. C. Gu and Y. L. Wei, *Appl. Surf. Sci.*, 2020, **509**, 144659.
